# Supplementary material for: Unexpected high abyssal ophiuroid diversity in polymetallic nodule fields of the northeast Pacific Ocean and implications for conservation
Source: Copernicus journal article supplement (doi:10.5194/bg-17-1845-2020), 2020-04-07
Supplement: Supplementary file 1 [file bg-17-1845-2020-supplement.zip]

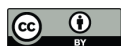

## *Supplement of*

# **Unexpected high abyssal ophiuroid diversity in polymetallic nodule fields of the northeast Pacific Ocean and implications for conservation**

**Magdalini Christodoulou et al.**

*Correspondence to:* Magdalini Christodoulou ([magdalini.christodoulou@senckenberg.de](mailto:magdalini.christodoulou@senckenberg.de))

- [bg-17-1845-2020-supplement-title-page.pdf](#)
- [Results species delimitation.docx](#)
- [Table S1.xlsx](#)
- [Table S2.xlsx](#)
- [Taxonomic and systematic remarks.docx](#)

The copyright of individual parts of the supplement might differ from the CC BY 4.0 License.
