# Supplementary material for: Unexpected high abyssal ophiuroid diversity in polymetallic nodule fields of the northeast Pacific Ocean and implications for conservation
Source: Copernicus journal article supplement (doi:10.5194/bg-17-1845-2020), 2020-04-07
Supplement: Supplementary file 2 [file bg-17-1845-2020-supplement.zip]

Archive with 5 entries (5 files):
- Table S1.xlsx
- Results species delimitation.docx
- Taxonomic and systematic remarks.docx
- bg-17-1845-2020-supplement-title-page.pdf
- Table S2.xlsx
