# Supplementary material for: Unexpected high abyssal ophiuroid diversity in polymetallic nodule fields of the northeast Pacific Ocean and implications for conservation
Source: Copernicus journal article supplement (doi:10.5194/bg-17-1845-2020), 2020-04-07
Supplement: Supplementary file 2 [file bg-17-1845-2020-supplement.zip › Results species delimitation.docx]

**Results of species delimitation methods**

1. *Result of ABGD species delimitation*


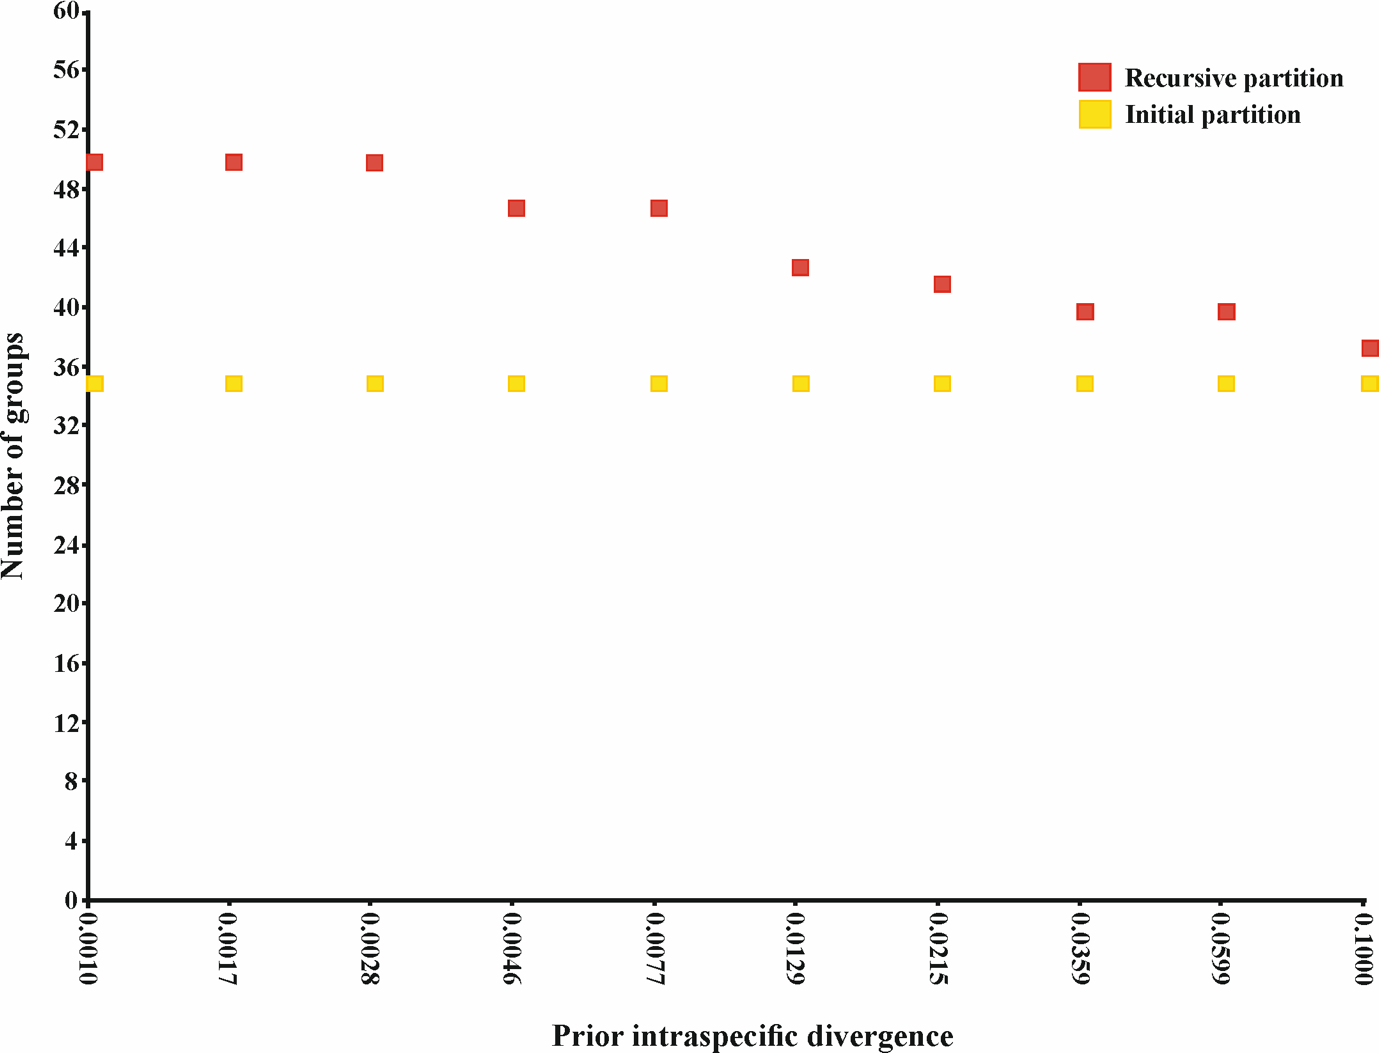


**Figure S1.** Number of partitions (initial and recursive) recovered by the Automatic Barcode Gap Discovery (ABGD) analysis.

2. *Result of GMYC species delimitation*

Method: single

Likelihood of null model: 2319.282

Maximum likelihood of GMYC model: 2420.327

Likelihood ratio: 202.0915

Result of LR test: 0***

Number of ML clusters: 30

Confidence interval: 29-30

Number of ML entities: 47

Confidence interval: 46-49

Threshold time: -0.01800845

*
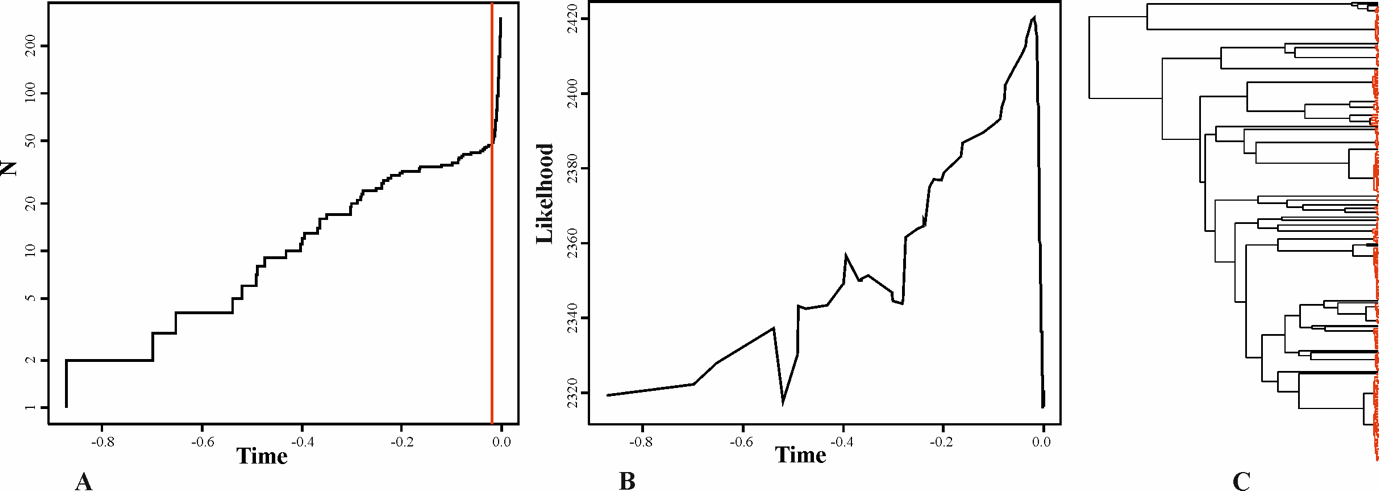
*

**Figure S2.** Results of the Ophiuroidea species delimitation analysis according to the GMYC single-threshold model on the DNA barcode data set. (a) Lineage-through-time plot based on the ultrametric tree obtained from COI sequences; (b) likelihood function produced by GMYC to estimate the peak of transition between interspecific diversification and allele intraspecific coalescence along the branches; and (c) ultrametric tree with 300 individuals obtained in BEAST. Red clusters and black lines (singletons) indicate putative species calculated by the model. [Colour figure

3.1. *Result of mPTP species delimitation*

Number of edges greater than minimum branch length: 340 / 598

Null-model score: 1167.803424

Best score for multi coalescent rate: 1167.803424

Number of delimited species: 42

Species 1:

SO239_415~Ophiacantha~cosmica

MA13_85_30

SO239_413

SO239_419

SO239_412

SO239_408

SO239_411-2

SO239_414

MA14_20_4

SO239_403

SO239_417

SO239_407

SO239_416

SO239_418

SO239_409

SO242_2_176_F7

SO242_2_191_F5

SO239_130

AB2_EB1_13_5

Species 2:

SO239_20_12~Ophiotoma~species.21

SO242_1_116_A6

53_159_3

Species 3:

AB2_EB1_14_22

SO239_24_24

MA14_66_16

AB2_EB1_13_20

AB2_EB1_13_16

AB2_EB1_16_14

SO239_59_3

MA13_07_8

MA14_39_2

AB2_EB2_15_12

SO239_50_5

NODBIO_33_9

SO239_20_11

MA13_18_6

KU519565.1_NHM_303

KU519566.1_NHM_371

MA14_38_13

MA13_85_3~Ophiotholia~species.1

MA14_67_4

MA13_90_18

Species 4:

MA13_85_17~Ophiocymbium~species.40

AB1_EB4_11_28

SO239_24_15

MA14_21_10

SO239_24_19

53_204_2

Species 5:

AB1_EB4_11_30~Ophiocymbium~species.25

KU519564.1_NHM_072

Species 6:

MA13_18_5~Ophiocymbium~species.39

AB2_EB1_13_41

Species 7:

SO239_192_4~Ophiocymbium~species.24

SO239_210_1

AB2_EB1_13_40~Ophiocymbium~species.24

AB2_EB1_13_8

AB2_EB2_12_12

AB2_EB2_12_9

AB2_EB1_13_30

Species 8:

SO239_81_4~Ophiotholia~species.41

AB2_EB2_12_13~Ophiotholia~species.28

KU519559.1_NHM_076

KU519560.1_NHM_078

KU519561.1_NHM_104

KU519562.1_NHM_119

MA14_66_10

SO239_197_3~Ophiotholia~species.28

Species 9:

SO239_192_6~Ophiohelidae~species.32

Species 10:

AB1_EB4_11_26~Ophiomyces~species.26

AB1_EB5_10_1

AB1_EB5_10_3

AB1_EB4_11_24

AB1_EB4_11_25

KU519563.1_NHM_041

AB1_EB4_11_22

AB1_EB3_9_1

Species 11:

SO239_197_4~Ophioscolecidae~species.17

SO239_197_6

SO239_197_5

Species 12:

SO239_192_8~Ophioscolecidae~species.20

SO239_192_7

SO239_158_3

SO239_192_2

Species 13:

SO242_1_116~Ophioscolecidae~species.38

53_175_5

SO242_1_422

53_053_4

Species 14:

SO242_1_347~Ophioscolecidae~species.18

SO239_24_21

MA13_18_7

Species 15:

AB2_EB2_12_10~Ophioscolecidae~species.19

Species 16:

MA14_21_12~Ophiernus~species.31

SO242_1_309~Ophiernus~species.31

Species 17:

SO239_397~Ophioleuce~gracilis

Species 18:

SO239_192_5~Ophioleucidae~species.42

Species 19:

SO239_133_1~Ophioleucidae~species.29

MA14_66_6

53_053_1

SO239_24_3~Ophioleucidae~species.29

AB1_EB4_11_23

SO239_20_5

SO239_24_26

SO239_118_9

SO239_133_4

SO239_81_22

SO239_81_19

53_175_3

MA14_66_5

SO239_24_12

SO239_24_14

AB2_EB1_13_38

AB2_EB1_13_17

SO242_1_227_D6

MA13_85_37

SO239_81_6

SO239_81_10

NODBIO_101_3

AB2_EB2_12_7

AB1_EB4_11_29

MA14_38_5

SO239_158_2

NODBIO_33_23

53_175_6

Species 20:

SO239_59_1~Ophioleucidae~species.22

AB1_EB5_10_10

NODBIO_33_22

SO239_24_17

Species 21:

AB1_EB5_10_9~Ophioleucidae~species.33

Species 22:

SO239_139_2~Ophioleucidae~species.37

SO239_200_1

SO239_192_1

SO239_192_3

SO239_197_1

Species 23:

AB2_EB1_13_24~Ophioleucidae~species.35

AB2_EB1_13_6

SO239_133_2

SO239_24_5

SO239_118_8

MA14_66_12

SO239_20_7

SO239_81_25

SO239_118_14

SO239_81_16

Species 24:

MA14_21_3~Ophioleucidae~species.34

Species 25:

SO239_118_1~Ophiotypa~simplex

AB1_EB5_4

AB2_EB2_12_3

AB2_EB1_16_3

SO239_81_9

KM_1307

Species 26:

MA13_18_8~Amphilepis~species.5

SO242_1_252

MA14_39_9~Amphilepis~species.5

MA13_85_32

MA13_90_09

SO242_1_181_D3

Species 27:

AB2_EB2_15_10~Amphioplus~daleus

SO239_20_2

SO242_1_227_D5

SO239_81_2

AB2_EB1_14_3

MA14_21_6

SO239_16-1_1

AB1_EB4_11_17

MA13_90_12

SO239_24_23

SO239_158_1B

KU519545.1_NHM_447

KU519544.1_NHM_094

SO242_1_387_B6

SO242_1_181_D4

AB2_EB1_16_13

MA13_85_20

MA14_38_44

NODBIO_33_1

SO239_50_4

AB1_EB5_10_4

MA14_67_8

53_053_2

NODBIO_101_1

SO239_133_8

MA13_07_1

AB2_EB1_13_26

SO239_81_20

NODBIO_101_9

MA13_18_3

SO239_171_2

SO239_24-1_6

MA14_66_4

AB2_EB2_12_11

SO239_118_2

NODBIO_33_18

Species 28:

AB1_EB3_9_5~Amphioplus~cf.daleus

AB2_EB1_14_27~Amphioplus~cf.daleus

Species 29:

AB1_EB4_11_9~Amphiophiura~bullata

SO239_118_12

SO239_118_5

MA13_90_16

SO239_133_5

AB1_EB5_10_11

SO239_133_9

SO239_133_3

SO239_118_13

NODBIO_80_1

SO239_2018

Species 30:

SO239_395~Ophiuroglypha~species.11

Species 31:

AB2_EB1_16_7~Ophiuroglypha~species.6

SO242_2_222_F1

SO239_20_19

AB2_EB2_12_6

AB2_EB2_12_8

MA14_38_3

MA14_20_5

MA14_66_7

AB2_EB1_16_6

AB2_EB2_15_7

Species 32:

SO239_118_6~Ophiuroglypha~species.6

AB2_EB1_13_27

SO239_682

SO239_2037

Species 33:

SO242_2_176_F8~Ophiuroglypha~species.7

Species 34:

SO239_59_18~Ophiuroglypha~species.14

Species 35:

SO239_396~Anophiura~species.10

Species 36:

SO239_2087~Ophiuroglypha~species.9

SO239_2063

SO239_2080

SO239_2082

SO239_2074

SO239_2085

SO239_2086

SO239_2093

SO239_2059

SO239_2091

SO239_2092

SO239_2078

SO239_2088

SO239_2084

Species 37:

SO239_59_10~Ophiopyrgidae~species.8

Species 38:

SO239_197_2~Ophiophyllum~species.15

SO239_139_1

Species 39:

MA13_07_7~Ophiosphalma~cf.glabrum

AB1_EB5_3

SO242_1_116_A5

SO242_2_154

AB1_EB3_9_2

AB2_EB2_15_14

53_224_3_2

MA13_38_15

MA14_20_3

AB2_EB1_16_4

MA14_21_2

SO239_2014

AB1_EB4_11_3

NODBIO_33_7

AB2_EB1_14_2

SO239_50_10

SO239_24-1-1

SO239_24_18

NODBIO_33_10

MA13_85_41

AB1_EB5_10_2

AB1_EB4_11_8

SO242_1_076

Species 40:

NODBIO_80_2~Ophiosphalma~glabrum

MA13_07_2

MA13_85_7

MA14_21_7

AB2_EB1_13_18

SO239_686

SO242_2_222_F2

SO239_2011

AB2_EB1_14_13

KU519552.1_NHM_009

KU519554.1_NHM_256

SO239_410

AB2_EB1_16_10

AB2_EB1_14_8

SO239_128

SO239_132

MA13_90_1

KU519558.1_NHM_452

KU519557.1_NHM_415

SO239_50_2

SO239_81_8

SO239_118_15

SO239_131_1

SO239_2015

SO239_674

MA13_38_12

KU519556.1_NHM_335

MA14_67_11

KU519553.1_NHM_124

KU519555.1_NHM_329

SO239_24_4

AB1_EB5_10_7

SO239_20_18

SO239_59_16

Species 41:

SO242_1_387_A7~Perlophiura~profundissima

KU519567.1

Species 42:

SO239_2113~Asteroschema~species.12
